# Supplementary material for: Expansion of the Invasive Plant Species Reynoutria japonica Houtt in the Upper Bistrița Mountain River Basin with a Calculus on the Productive Potential of a Mountain Meadow
Source: MDPI journal article supplement (doi:10.3390/su14095737), 2022-05-09
Supplement: s1 [file s1]

Supplementary S1. Figures S1–S7, captures from the field campaign (2021)

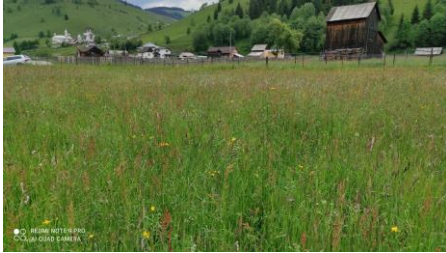

**Figure S1.** General view with investigated meadow

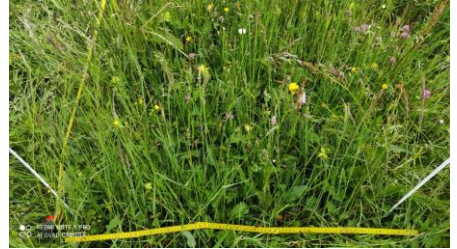

**Figure S2.** Measurement of test plots

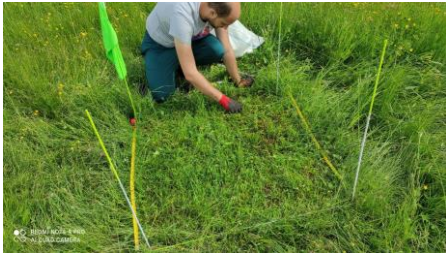

**Figure S3.** Careful and complete collection of biomass from the test plot

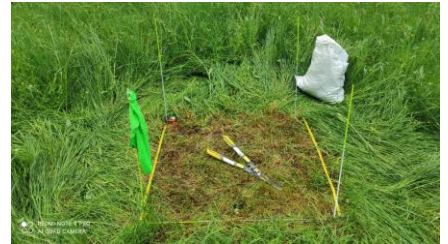

**Figure S4.** Completion of biomass collection from the test plot

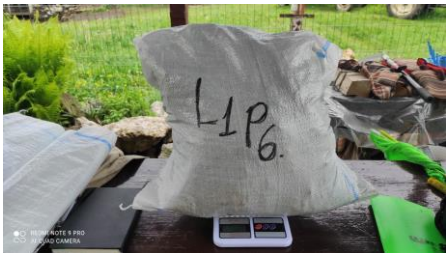

**Figure S5.** Total green weighing of the sample obtained from the test square

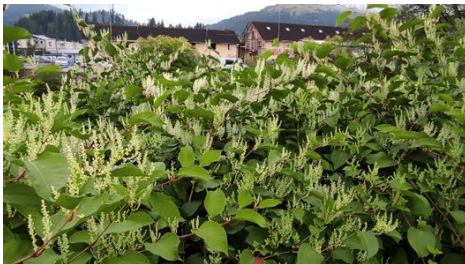

**Figure S6.** *R. japonica*, installed on a meadow near Vatra-Dornei.

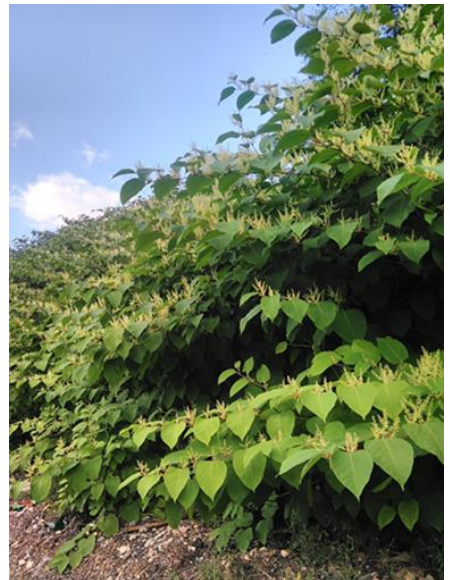

**Figure S7.** *R. japonica*, installed on disturbed ground.

Supplementary S2

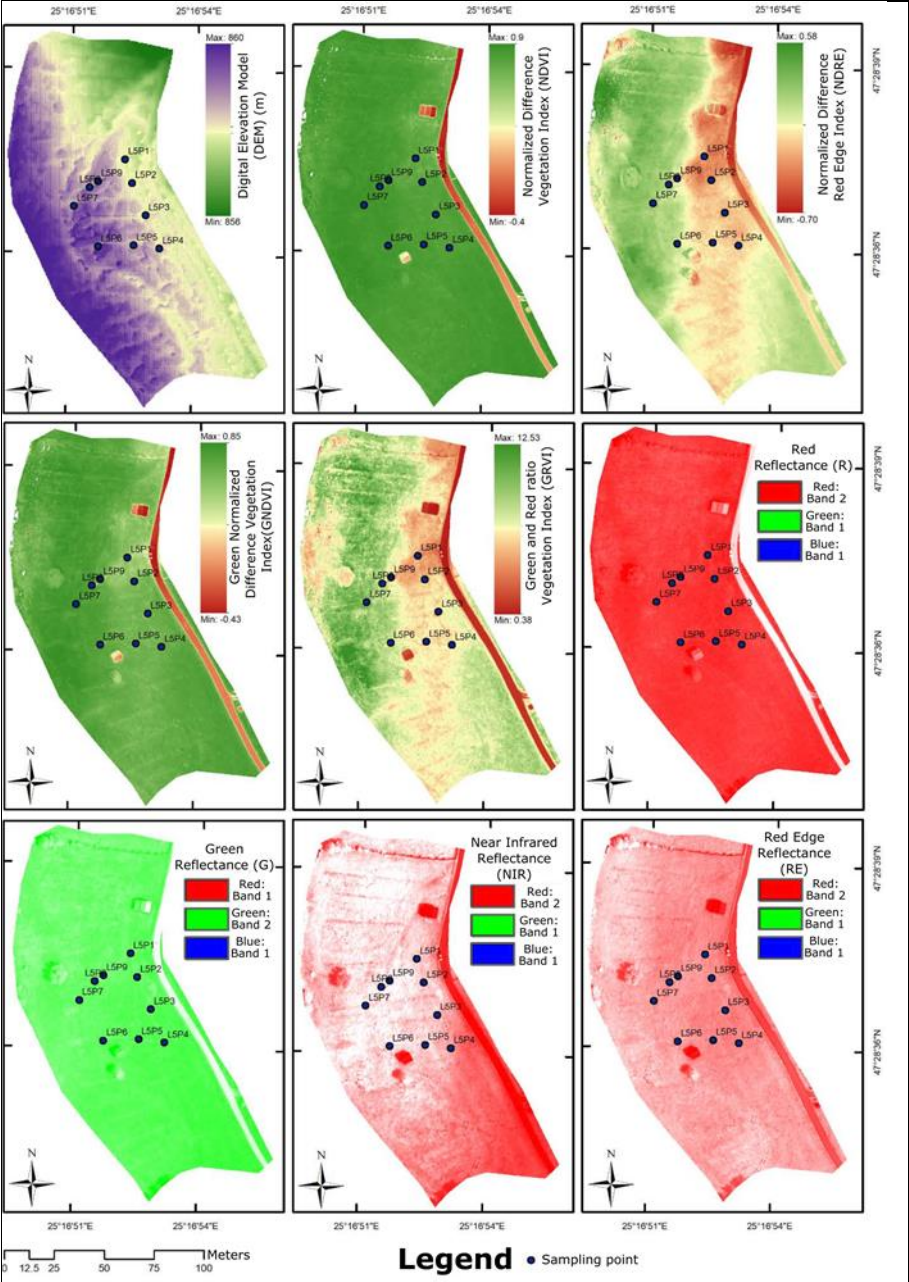

**Figure S8.** DEM; NDVI; INDRE; GNDVI; GRVI, and Red, Green, NIR, and RE Reflectance.
